# Supplementary material for: RediScore: Prospective validation of a pipeline for homologous recombination deficiency analysis
Source: PubMed Central journal article supplement — Oncol Lett. 2023 Sep 22;26(5):480. doi: 10.3892/ol.2023.14060 (PMC10551864; doi:10.3892/ol.2023.14060), 2023-09-22

Figure S1. Workflow of the homologous recombination deficiency status analysis of the 444 ovarian cancer patients with the determination of the *BRCA1/2* somatic mutation status and the GIS score status. GIS, genomic instability score; NGS, next-generation sequencing; MAPD, median of the absolute values of all pairwise differences.

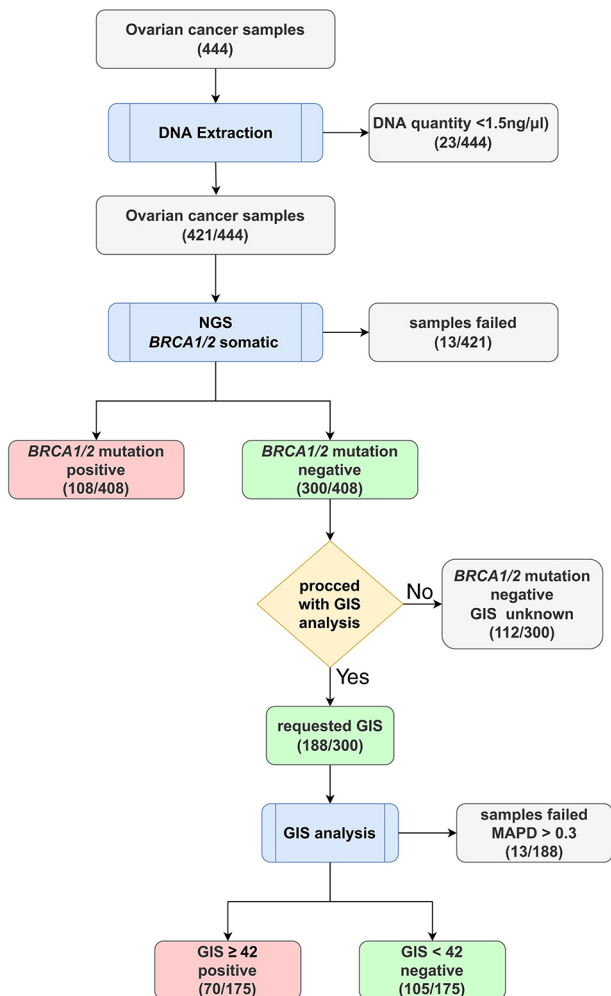

Supplement: Supplementary_Data1.pdf [file Supplementary_Data1.pdf]
