# Supplementary material for: RediScore: Prospective validation of a pipeline for homologous recombination deficiency analysis
Source: PubMed Central journal article supplement — Oncol Lett. 2023 Sep 22;26(5):480. doi: 10.3892/ol.2023.14060 (PMC10551864; doi:10.3892/ol.2023.14060), 2023-09-22
Supplement: Supplementary_Data2.pdf [file Supplementary_Data2.pdf]

Table SI. *BRCA1/2* analysis results in formalin-fixed paraffin-embedded tissue samples from 444 patients with ovarian cancer.

| Sample | Result   | Result details                                                                                                                        | Diagnosis | Age at diagnosis, years |
|--------|----------|---------------------------------------------------------------------------------------------------------------------------------------|-----------|-------------------------|
| 1      | Negative | No known pathogenic mutation was identified in patient's tumor tissue.                                                                | CA ovary  | 47                      |
| 2      | Negative | No known pathogenic mutation was identified in patient's tumor tissue.                                                                | CA ovary  | 71                      |
| 3      | Negative | No known pathogenic mutation was identified in patient's tumor tissue.                                                                | CA ovary  | 73                      |
| 4      | Negative | No known pathogenic mutation was identified in patient's tumor tissue.                                                                | CA ovary  | 67                      |
| 5      | Positive | BRCA1- The clinically significant variant c.5266dupC, p. (Gln1756Profs*74) was identified in exon 19 of the BRCA1 gene (NM_007294).   | CA ovary  | 68                      |
| 6      | Positive | BRCA2- The clinically significant variant NM_000059:c.9371A>T, p.(Asn3124Ile) was identified in the BRCA2 gene.                       | CA ovary  | 72                      |
| 7      | Negative | No known pathogenic mutation was identified in patient's tumor tissue.                                                                | CA ovary  | 54                      |
| 8      | Negative | No known pathogenic mutation was identified in patient's tumor tissue.                                                                | CA ovary  | 58                      |
| 9      | Positive | BRCA2- The clinically significant variant NM_000059:c.7758G>A, p.(Trp2586Ter) was identified in the BRCA2 gene.                       | CA ovary  | 39                      |
| 10     | Negative | No known pathogenic mutation was identified in patient's tumor tissue.                                                                | CA ovary  | 46                      |
| 11     | Negative | No known pathogenic mutation was identified in patient's tumor tissue.                                                                | CA ovary  | 75                      |
| 12     | Negative | No known pathogenic mutation was identified in patient's tumor tissue.                                                                | CA ovary  | 81                      |
| 13     | Positive | BRCA2- The clinically significant variant NM_000059:c.4632_4633delCCinsT, p.(Leu1545PhefsTer23) was identified in the BRCA2 gene.     | CA ovary  | 64                      |
| 14     | Positive | BRCA1- The clinically significant variant NM_007294:c.3607C>T, p.(Arg1203Ter) was identified in the BRCA1 gene.                       | CA ovary  | 42                      |
| 15     | Positive | BRCA1- The clinically significant variant NM_007294: c.3506dup, p.(Asp1169fs) was identified in the BRCA1 gene.                       | CA ovary  | 49                      |
| 16     | Failure  | The sample under investigation has been processed; however, the analysis was not possible due to low quality of the genetic material. | CA ovary  | 52                      |
| 17     | Failure  | The sample under investigation has been processed; however, the analysis was not possible due to low quality of the genetic material. | CA ovary  | 78                      |
| 18     | Negative | No known pathogenic mutation was identified in patient's tumor tissue.                                                                | CA ovary  | 77                      |
| 19     | Negative | No known pathogenic mutation was identified in patient's tumor tissue.                                                                | CA ovary  | 68                      |
| 20     | Negative | No known pathogenic mutation was identified in patient's tumor tissue.                                                                | CA ovary  | 44                      |
| 21     | Negative | No known pathogenic mutation was identified in patient's tumor tissue.                                                                | CA ovary  | 37                      |
| 22     | Negative | No known pathogenic mutation was identified in patient's tumor tissue.                                                                | CA ovary  | 77                      |
| 23     | Negative | No known pathogenic mutation was identified in patient's tumor tissue.                                                                | CA ovary  | 76                      |
| 24     | Negative | No known pathogenic mutation was identified in patient's tumor tissue.                                                                | CA ovary  | 48                      |
| 25     | Failure  | The sample under investigation has been processed; however, the analysis was not possible due to low quality of the genetic material. | CA ovary  | 49                      |
| 26     | Negative | No known pathogenic mutation was identified in patient's tumor tissue.                                                                | CA ovary  | 43                      |

|    |          |                                                                                                                                       |          |    |
|----|----------|---------------------------------------------------------------------------------------------------------------------------------------|----------|----|
| 27 | Failure  | The sample under investigation has been processed; however, the analysis was not possible due to low quality of the genetic material. | CA ovary | 67 |
| 28 | Failure  | The sample under investigation has been processed; however, the analysis was not possible due to low quality of the genetic material. | CA ovary | 69 |
| 29 | Positive | BRCA2- The clinically significant variant NM_000059:c.3847_3848del, p.(Val1283fs) was identified in the BRCA2 gene.                   | CA ovary | 63 |
| 30 | Negative | No known pathogenic mutation was identified in patient's tumor tissue                                                                 | CA ovary | 64 |
| 31 | Positive | BRCA1- The clinically significant variant NM_007294:c.181T>G, p.(Cys61Gly) was identified in the BRCA1 gene                           | CA ovary | 68 |
| 32 | Negative | No known pathogenic mutation was identified in patient's tumor tissue.                                                                | CA ovary | 50 |
| 33 | Negative | No known pathogenic mutation was identified in patient's tumor tissue.                                                                | CA ovary | 85 |
| 34 | Positive | BRCA1- The clinically significant variant NM_007294:c.181T>G, p.(Cys61Gly) was identified in the BRCA1 gene                           | CA ovary | 66 |
| 35 | Negative | No known pathogenic mutation was identified in patient's tumor tissue.                                                                | CA ovary | 78 |
| 36 | Failure  | The sample under investigation has been processed; however, the analysis was not possible due to low quality of the genetic material. | CA ovary | 45 |
| 37 | Negative | No known pathogenic mutation was identified in patient's tumor tissue.                                                                | CA ovary | 46 |
| 38 | Negative | No known pathogenic mutation was identified in patient's tumor tissue.                                                                | CA ovary | 86 |
| 39 | Positive | BRCA1- The clinically significant variant NM_007294:c.3607C>T, p.(Arg1203Ter) was identified in the BRCA1 gene.                       | CA ovary | 64 |
| 40 | Positive | BRCA1- The clinically significant variant NM_007294:c.181T>G, p.(Cys61Gly) was identified in the BRCA1 gene.                          | CA ovary | 64 |
| 41 | Negative | No known pathogenic mutation was identified in patient's tumor tissue.                                                                | CA ovary | 55 |
| 42 | Positive | BRCA1- The clinically significant variant NM_007294:c.3607C>T, p.(Arg1203Ter) was identified in the BRCA1 gene.                       | CA ovary | 70 |
| 43 | Positive | BRCA2- The clinically significant variant NM_000059:c.2636_2637del, p.(Ser879Ter) was identified in the BRCA2 gene.                   | CA ovary | 75 |
| 44 | Failure  | The sample under investigation has been processed; however, the analysis was not possible due to low quality of the genetic material. | CA ovary | 52 |
| 45 | Negative | No known pathogenic mutation was identified in patient's tumor tissue.                                                                | CA ovary | 71 |
| 46 | Negative | No known pathogenic mutation was identified in patient's tumor tissue.                                                                | CA ovary | 77 |
| 47 | Negative | No known pathogenic mutation was identified in patient's tumor tissue.                                                                | CA ovary | 75 |
| 48 | Negative | No known pathogenic mutation was identified in patient's tumor tissue.                                                                | CA ovary | 65 |
| 49 | Negative | No known pathogenic mutation was identified in patient's tumor tissue.                                                                | CA ovary | 70 |
| 50 | Negative | No known pathogenic mutation was identified in patient's tumor tissue.                                                                | CA ovary | 63 |
| 51 | Failure  | The sample under investigation has been processed; however, the analysis was not possible due to low quality of the genetic material. | CA ovary | 83 |
| 52 | Negative | No known pathogenic mutation was identified in patient's tumor tissue.                                                                | CA ovary | 81 |
| 53 | Negative | No known pathogenic mutation was identified in patient's tumor tissue.                                                                | CA ovary | 41 |

|    |          |                                                                                                                                       |          |    |
|----|----------|---------------------------------------------------------------------------------------------------------------------------------------|----------|----|
| 54 | Negative | No known pathogenic mutation was identified in patient's tumor tissue.                                                                | CA ovary | 86 |
| 55 | Negative | No known pathogenic mutation was identified in patient's tumor tissue.                                                                | CA ovary | 63 |
| 56 | Negative | No known pathogenic mutation was identified in patient's tumor tissue.                                                                | CA ovary | 61 |
| 57 | Negative | No known pathogenic mutation was identified in patient's tumor tissue.                                                                | CA ovary | 78 |
| 58 | Positive | BRCA1- The clinically significant variant NM_007294:c.3607C>T, p.(Arg1203Ter) was identified in the BRCA1 gene.                       | CA ovary | 53 |
| 59 | Negative | No known pathogenic mutation was identified in patient's tumor tissue.                                                                | CA ovary | 62 |
| 60 | Negative | No known pathogenic mutation was identified in patient's tumor tissue.                                                                | CA ovary | 88 |
| 61 | Negative | No known pathogenic mutation was identified in patient's tumor tissue.                                                                | CA ovary | 73 |
| 62 | Positive | BRCA2- The clinically significant variant NM_000059:c.7007G>A, p.(Arg2336His) was identified in the BRCA2 gene                        | CA ovary | 47 |
| 63 | Positive | BRCA1- The clinically significant variant NM_007294: c.7346_7347insAA, p.(Asn2450IlefsTer18) was identified in the BRCA1 gene.        | CA ovary | 75 |
| 64 | Failure  | The sample under investigation has been processed; however, the analysis was not possible due to low quality of the genetic material. | CA ovary | 62 |
| 65 | Negative | No known pathogenic mutation was identified in patient's tumor tissue.                                                                | CA ovary | 73 |
| 66 | Negative | No known pathogenic mutation was identified in patient's tumor tissue.                                                                | CA ovary | 66 |
| 67 | Negative | No known pathogenic mutation was identified in patient's tumor tissue.                                                                | CA ovary | 78 |
| 68 | Negative | No known pathogenic mutation was identified in patient's tumor tissue.                                                                | CA ovary | 56 |
| 69 | Failure  | The sample under investigation has been processed; however, the analysis was not possible due to low quality of the genetic material. | CA ovary | 69 |
| 70 | Negative | No known pathogenic mutation was identified in patient's tumor tissue.                                                                | CA ovary | 62 |
| 71 | Negative | No known pathogenic mutation was identified in patient's tumor tissue.                                                                | CA ovary | 48 |
| 72 | Negative | No known pathogenic mutation was identified in patient's tumor tissue.                                                                | CA ovary | 57 |
| 73 | Positive | BRCA1-The clinically significant variant NM_007294:c.3607C>T, p.(Arg1203Ter) was identified in the BRCA1 gene.                        | CA ovary | 55 |
| 74 | Negative | No known pathogenic mutation was identified in patient's tumor tissue.                                                                | CA ovary | -  |
| 75 | Negative | No known pathogenic mutation was identified in patient's tumor tissue.                                                                | CA ovary | 70 |
| 76 | Negative | No known pathogenic mutation was identified in patient's tumor tissue.                                                                | CA ovary | 78 |
| 77 | Failure  | The sample under investigation has been processed; however, the analysis was not possible due to low quality of the genetic material. | CA ovary | 51 |
| 78 | Positive | BRCA1- The clinically significant variant NM_007294:c.3607C>T, p.(Arg1203Ter) was identified in the BRCA1 gene.                       | CA ovary | 49 |
| 79 | Positive | BRCA1- The clinically significant variant:c.5266dupC, p.Gln1756Profs*74 was identified in the BRCA1 gene.                             | CA ovary | 74 |
| 80 | Negative | No known pathogenic mutation was identified in patient's tumor tissue                                                                 | CA ovary | 58 |
| 81 | Positive | BRCA1- The clinically significant variant NM_007294:c.5266dupC, p.(Gln1756Profs*74) was identified in the BRCA1 gene.                 | CA ovary | 70 |
| 82 | Negative | No known pathogenic mutation was identified in patient's tumor tissue                                                                 | CA ovary | 48 |

|     |          |                                                                                                                                           |          |    |
|-----|----------|-------------------------------------------------------------------------------------------------------------------------------------------|----------|----|
| 83  | Failure  | The sample under investigation has been processed; however, the analysis was not possible due to low quality of the genetic material.     | CA ovary | 79 |
| 84  | Negative | No known pathogenic mutation was identified in patient's tumor tissue.                                                                    | CA ovary | 51 |
| 85  | Positive | BRCA2- The clinically significant variant NM_000059:c.4533_4546delACGTGATGAAAAGA, p.(Glu1511AspfsTer13) was identified in the BRCA2 gene. | CA ovary | 51 |
| 86  | Failure  | The sample under investigation has been processed; however, the analysis was not possible due to low quality of the genetic material.     | CA ovary | 65 |
| 87  | Failure  | The sample under investigation has been processed; however, the analysis was not possible due to low quality of the genetic material.     | CA ovary | 53 |
| 88  | Negative | No known pathogenic mutation was identified in patient's tumor tissue.                                                                    | CA ovary | 78 |
| 89  | Negative | No known pathogenic mutation was identified in patient's tumor tissue.                                                                    | CA ovary | 47 |
| 90  | Negative | No known pathogenic mutation was identified in patient's tumor tissue.                                                                    | CA ovary | 69 |
| 91  | Positive | BRCA1- The clinically significant variant NM_007294:c.4117G>T, p.(Glu1373Ter) was identified in the BRCA1 gene.                           | CA ovary | 62 |
| 92  | Negative | No known pathogenic mutation was identified in patient's tumor tissue.                                                                    | CA ovary | 53 |
| 93  | Negative | No known pathogenic mutation was identified in patient's tumor tissue.                                                                    | CA ovary | 67 |
| 94  | Failure  | The sample under investigation has been processed; however, the analysis was not possible due to low quality of the genetic material.     | CA ovary | 56 |
| 95  | Positive | BRCA1- The clinically significant variant NM_007294:c.4035del, p.(Glu1346fs) was identified in the BRCA1 gene.                            | CA ovary | 66 |
| 96  | Failure  | The sample under investigation has been processed; however, the analysis was not possible due to low quality of the genetic material.     | CA ovary | 48 |
| 97  | Positive | BRCA1- The clinically significant variant NM_007294:c.68_69del, p.(Glu23fs) was identified in the BRCA1 gene.                             | CA ovary | 53 |
| 98  | Negative | BRCA1 - The clinically significant variant NM_007294:c.3700_3704del, p.(Val1234fs) was identified in the BRCA1 gene.                      | CA ovary | 77 |
| 99  | Positive | BRCA1- The clinically significant variant NM_007294:c.3700_3704del, p.(Val1234fs) was identified in the BRCA1 gene.                       | CA ovary | 69 |
| 100 | Positive | BRCA2- The clinically significant variant NM_000059:c.9134del, p.(Leu3045fs) was identified in the BRCA2 gene.                            | CA ovary | 55 |
| 101 | Negative | No known pathogenic mutation was identified in patient's tumor tissue.                                                                    | CA ovary | 59 |
| 102 | Positive | BRCA1- The clinically significant variant NM_007294:c.3461T>A, p.(Leu1154Ter) was identified in the BRCA1 gene.                           | CA ovary | 66 |
| 103 | Negative | No known pathogenic mutation was identified in patient's tumor tissue.                                                                    | CA ovary | 54 |
| 104 | Negative | No known pathogenic mutation was identified in patient's tumor tissue.                                                                    | CA ovary | 37 |
| 105 | Failure  | The sample under investigation has been processed; however, the analysis was not possible due to low quality of the genetic material.     | CA ovary | 71 |
| 106 | Negative | No known pathogenic mutation was identified in patient's tumor tissue.                                                                    | CA ovary | 63 |

|     |          |                                                                                                                                       |          |    |
|-----|----------|---------------------------------------------------------------------------------------------------------------------------------------|----------|----|
| 107 | Negative | No known pathogenic mutation was identified in patient's tumor tissue.                                                                | CA ovary | 54 |
| 108 | Positive | BRCA1- The clinically significant variant NM_007294:c.181T>G, p.(Cys61Gly) was identified in the BRCA1 gene.                          | CA ovary | 54 |
| 109 | Positive | BRCA1- The clinically significant variant NM_007294:c.5266dupC, p. (Gln1756Profs*74)) was identified in the BRCA1 gene.               | CA ovary | 37 |
| 110 | Negative | No known pathogenic mutation was identified in patient's tumor tissue.                                                                | CA ovary | 58 |
| 111 | Negative | No known pathogenic mutation was identified in patient's tumor tissue.                                                                | CA ovary | 80 |
| 112 | Positive | BRCA2- The clinically significant variant NM_000059:c.4504C>T, p.(Gln1502Ter) was identified in the BRCA2 gene.                       | CA ovary | 71 |
| 113 | Negative | No known pathogenic mutation was identified in patient's tumor tissue.                                                                | CA ovary | 72 |
| 114 | Negative | No known pathogenic mutation was identified in patient's tumor tissue.                                                                | CA ovary | 44 |
| 115 | Negative | No known pathogenic mutation was identified in patient's tumor tissue.                                                                | CA ovary | 68 |
| 116 | Negative | No known pathogenic mutation was identified in patient's tumor tissue.                                                                | CA ovary | 77 |
| 117 | Negative | No known pathogenic mutation was identified in patient's tumor tissue.                                                                | CA ovary | 38 |
| 118 | Positive | BRCA1- The clinically significant variant NM_007294:c.3607C>T, p.(Arg1203Ter ) was identified in the BRCA1 gene.                      | CA ovary | 59 |
| 119 | Negative | No known pathogenic mutation was identified in patient's tumor tissue.                                                                | CA ovary | 66 |
| 120 | Negative | No known pathogenic mutation was identified in patient's tumor tissue.                                                                | CA ovary | 61 |
| 121 | Failure  | The sample under investigation has been processed; however, the analysis was not possible due to low quality of the genetic material. | CA ovary | 62 |
| 122 | Negative | No known pathogenic mutation was identified in patient's tumor tissue.                                                                | CA ovary | 69 |
| 123 | Negative | No known pathogenic mutation was identified in patient's tumor tissue.                                                                | CA ovary | 60 |
| 124 | Negative | No known pathogenic mutation was identified in patient's tumor tissue.                                                                | CA ovary | 33 |
| 125 | Negative | No known pathogenic mutation was identified in patient's tumor tissue.                                                                | CA ovary | 37 |
| 126 | Negative | No known pathogenic mutation was identified in patient's tumor tissue.                                                                | CA ovary | 52 |
| 127 | Negative | No known pathogenic mutation was identified in patient's tumor tissue.                                                                | CA ovary | 69 |
| 128 | Failure  | The sample under investigation has been processed; however, the analysis was not possible due to low quality of the genetic material. | CA ovary | 69 |
| 129 | Positive | BRCA1- The clinically significant variant NM_007294: c.5557dup, p.(Tyr1853LeufsTer27) was identified in the BRCA1 gene.               | CA ovary | 29 |
| 130 | Negative | No known pathogenic mutation was identified in patient's tumor tissue.                                                                | CA ovary | 64 |
| 131 | Negative | No known pathogenic mutation was identified in patient's tumor tissue.                                                                | CA ovary | 62 |
| 132 | Negative | No known pathogenic mutation was identified in patient's tumor tissue.                                                                | CA ovary | 61 |
| 133 | Positive | BRCA2- The clinically significant variant NM_000059: c.(?-1)_(-9649-1_?)del was identified in the BRCA2 gene.                         | CA ovary | 64 |
| 134 | Negative | No known pathogenic mutation was identified in patient's tumor tissue.                                                                | CA ovary | 66 |
| 135 | Negative | No known pathogenic mutation was identified in patient's tumor tissue.                                                                | CA ovary | 84 |
| 136 | Negative | No known pathogenic mutation was identified in patient's tumor tissue.                                                                | CA ovary | 82 |
| 137 | Negative | No known pathogenic mutation was identified in patient's tumor tissue.                                                                | CA ovary | 57 |

|     |          |                                                                                                                                       |          |    |
|-----|----------|---------------------------------------------------------------------------------------------------------------------------------------|----------|----|
| 138 | Negative | No known pathogenic mutation was identified in patient's tumor tissue.                                                                | CA ovary | 52 |
| 139 | Negative | No known pathogenic mutation was identified in patient's tumor tissue.                                                                | CA ovary | 67 |
| 140 | Negative | No known pathogenic mutation was identified in patient's tumor tissue.                                                                | CA ovary | 66 |
| 141 | Negative | No known pathogenic mutation was identified in patient's tumor tissue.                                                                | CA ovary | 65 |
| 142 | Negative | No known pathogenic mutation was identified in patient's tumor tissue.                                                                | CA ovary | 63 |
| 143 | Negative | No known pathogenic mutation was identified in patient's tumor tissue.                                                                | CA ovary | 50 |
| 144 | Negative | No known pathogenic mutation was identified in patient's tumor tissue.                                                                | CA ovary | 74 |
| 145 | Negative | No known pathogenic mutation was identified in patient's tumor tissue.                                                                | CA ovary | 61 |
| 146 | Negative | No known pathogenic mutation was identified in patient's tumor tissue.                                                                | CA ovary | 75 |
| 147 | Negative | No known pathogenic mutation was identified in patient's tumor tissue.                                                                | CA ovary | 58 |
| 148 | Negative | No known pathogenic mutation was identified in patient's tumor tissue.                                                                | CA ovary | 59 |
| 149 | Positive | BRCA1- The clinically significant variant NM_007294:c.5266dupC, was identified in the BRCA1 gene.                                     | CA ovary | 72 |
| 150 | Positive | BRCA1- The clinically significant variant NM_007294:c.5266dupC, p.(Gln1756Profs*74) was identified in the BRCA1 gene                  | CA ovary | 47 |
| 151 | Negative | No known pathogenic mutation was identified in patient's tumor tissue.                                                                | CA ovary | 49 |
| 152 | Negative | No known pathogenic mutation was identified in patient's tumor tissue.                                                                | CA ovary | 66 |
| 153 | Positive | BRCA1- The clinically significant variant NM_007294:c.3607C>T, p.(Arg1203Ter ) was identified in the BRCA1 gene.                      | CA ovary | 56 |
| 154 | Negative | No known pathogenic mutation was identified in patient's tumor tissue                                                                 | CA ovary | 49 |
| 155 | Negative | No known pathogenic mutation was identified in patient's tumor tissue                                                                 | CA ovary | 69 |
| 156 | Positive | BRCA1- The clinically significant variant NM_007294:c.4035del, p.(Glu1346fs) was identified in the BRCA1 gene.                        | CA ovary | 65 |
| 157 | Positive | BRCA2-The clinically significant variant NM_000059:c.5681dup, p.(Tyr1894Ter) was identified in the BRCA2 gene.                        | CA ovary | 80 |
| 158 | Negative | No known pathogenic mutation was identified in patient's tumor tissue                                                                 | CA ovary | 60 |
| 159 | Positive | BRCA2- The clinically significant variant NM_000059:c.5162delA p.(Asn1721Thrfs*4), was identified in the BRCA2 gene.                  | CA ovary | 35 |
| 160 | Positive | BRCA1- The clinically significant variant NM_007294:c.181T>G, p.(Cys61Gly) was identified in the BRCA1 gene.                          | CA ovary | 43 |
| 161 | Negative | No known pathogenic mutation was identified in patient's tumor tissue.                                                                | CA ovary | 69 |
| 162 | Negative | No known pathogenic mutation was identified in patient's tumor tissue.                                                                | CA ovary | 50 |
| 163 | Negative | No known pathogenic mutation was identified in patient's tumor tissue.                                                                | CA ovary | 66 |
| 164 | Negative | No known pathogenic mutation was identified in patient's tumor tissue.                                                                | CA ovary | 65 |
| 165 | Negative | No known pathogenic mutation was identified in patient's tumor tissue.                                                                | CA ovary | 63 |
| 166 | Failure  | The sample under investigation has been processed; however, the analysis was not possible due to low quality of the genetic material. | CA ovary | 59 |
| 167 | Negative | No known pathogenic mutation was identified in patient's tumor tissue.                                                                | CA ovary | 57 |
| 168 | Negative | No known pathogenic mutation was identified in patient's tumor tissue.                                                                | CA ovary | 50 |

|     |          |                                                                                                                                       |          |    |
|-----|----------|---------------------------------------------------------------------------------------------------------------------------------------|----------|----|
| 169 | Positive | BRCA1- The clinically significant variant NM_007294:c.1309del, p.(His437MetfsTer4) was identified in the BRCA1 gene.                  | CA ovary | 50 |
| 170 | Negative | No known pathogenic mutation was identified in patient's tumor tissue.                                                                | CA ovary | 65 |
| 171 | Failure  | The sample under investigation has been processed; however, the analysis was not possible due to low quality of the genetic material. | CA ovary | 72 |
| 172 | Negative | No known pathogenic mutation was identified in patient's tumor tissue.                                                                | CA ovary | 71 |
| 173 | Failure  | The sample under investigation has been processed; however, the analysis was not possible due to low quality of the genetic material. | CA ovary | 79 |
| 174 | Negative | No known pathogenic mutation was identified in patient's tumor tissue.                                                                | CA ovary | 62 |
| 175 | Positive | BRCA1- The clinically significant variant NM_007294:c.4874_4895dup, p.(Ser1633Ter) was identified in the BRCA1 gene.                  | CA ovary | 51 |
| 176 | Positive | BRCA1- The clinically significant variant NM_007294:c.212+3A&gt;G, was identified in the BRCA1 gene.                                  | CA ovary | 49 |
| 177 | Negative | No known pathogenic mutation was identified in patient's tumor tissue.                                                                | CA ovary | 59 |
| 178 | Negative | No known pathogenic mutation was identified in patient's tumor tissue.                                                                | CA ovary | 60 |
| 179 | Negative | No known pathogenic mutation was identified in patient's tumor tissue.                                                                | CA ovary | 70 |
| 180 | Negative | No known pathogenic mutation was identified in patient's tumor tissue.                                                                | CA ovary | 56 |
| 181 | Negative | No known pathogenic mutation was identified in patient's tumor tissue.                                                                | CA ovary | 62 |
| 182 | Positive | BRCA1- The clinically significant variant NM_007294:c.2761C&gt;T, p.(Gln921Ter) was identified in the BRCA1 gene.                     | CA ovary | 84 |
| 183 | Negative | No known pathogenic mutation was identified in patient's tumor tissue.                                                                | CA ovary | 63 |
| 184 | Negative | No known pathogenic mutation was identified in patient's tumor tissue.                                                                | CA ovary | 78 |
| 185 | Failure  | The sample under investigation has been processed; however, the analysis was not possible due to low quality of the genetic material. | CA ovary | 71 |
| 186 | Negative | No known pathogenic mutation was identified in patient's tumor tissue                                                                 | CA ovary | 78 |
| 187 | Positive | BRCA1- The clinically significant variant NM_007294:c.4539C&gt;A, p.(Cys1513Ter) was identified in the BRCA1 gene.                    | CA ovary | 58 |
| 188 | Negative | No known pathogenic mutation was identified in patient's tumor tissue.                                                                | CA ovary | 61 |
| 189 | Negative | No known pathogenic mutation was identified in patient's tumor tissue.                                                                | CA ovary | 65 |
| 190 | Positive | BRCA1- The clinically significant variant NM_007294:c.3097G&gt;T, p.(Glu1033Ter) was identified in the BRCA1 gene.                    | CA ovary | 70 |
| 191 | Negative | No known pathogenic mutation was identified in patient's tumor tissue.                                                                | CA ovary | 62 |
| 192 | Negative | No known pathogenic mutation was identified in patient's tumor tissue.                                                                | CA ovary | 55 |
| 193 | Failure  | The sample under investigation has been processed; however, the analysis was not possible due to low quality of the genetic material. | CA ovary | 71 |
| 194 | Negative | No known pathogenic mutation was identified in patient's tumor tissue.                                                                | CA ovary | 82 |
| 195 | Negative | No known pathogenic mutation was identified in patient's tumor tissue.                                                                | CA ovary | 77 |
| 196 | Negative | No known pathogenic mutation was identified in patient's tumor tissue.                                                                | CA ovary | 73 |
| 197 | Positive | BRCA2- The clinically significant variant NM_000059:c.4257del, p.(Asp1420fs) was                                                      | CA ovary | 44 |

|     |          |                                                                                                                                       |          |    |
|-----|----------|---------------------------------------------------------------------------------------------------------------------------------------|----------|----|
|     |          | identified in the BRCA2 gene.                                                                                                         |          |    |
| 198 | Positive | BRCA2- The clinically significant variant NM_000059:c.8611del, p.(Glu2871ArgfsTer20) was identified in the BRCA2 gene                 | CA ovary | 67 |
| 199 | Negative | No known pathogenic mutation was identified in patient's tumor tissue.                                                                | CA ovary | 69 |
| 200 | Negative | No known pathogenic mutation was identified in patient's tumor tissue.                                                                | CA ovary | 62 |
| 201 | Negative | No known pathogenic mutation was identified in patient's tumor tissue.                                                                | CA ovary | 53 |
| 202 | Negative | No known pathogenic mutation was identified in patient's tumor tissue.                                                                | CA ovary | 71 |
| 203 | Negative | No known pathogenic mutation was identified in patient's tumor tissue.                                                                | CA ovary | 70 |
| 204 | Positive | BRCA1- The clinically significant variant NM_007294:c.2178del, p.(Pro727fs) was identified in the BRCA1 gene.                         | CA ovary | 72 |
| 205 | Failure  | The sample under investigation has been processed; however, the analysis was not possible due to low quality of the genetic material. | CA ovary | 64 |
| 206 | Negative | No known pathogenic mutation was identified in patient's tumor tissue.                                                                | CA ovary | 42 |
| 207 | Negative | No known pathogenic mutation was identified in patient's tumor tissue.                                                                | CA ovary | 44 |
| 208 | Positive | BRCA1- The clinically significant variant NM_007294:c.1687C>T, p.(Gln563Ter) was identified in the BRCA1 gene.                        | CA ovary | 55 |
| 209 | Negative | No known pathogenic mutation was identified in patient's tumor tissue.                                                                | CA ovary | 75 |
| 210 | Positive | BRCA1- The clinically significant variant NM_007294:c.4012A>T, p.(Lys1338fs) was identified in the BRCA1 gene.                        | CA ovary | 54 |
| 211 | Negative | No known pathogenic mutation was identified in patient's tumor tissue.                                                                | CA ovary | 78 |
| 212 | Positive | BRCA1- The clinically significant variant NM_007294:c.68_69del, p.(Glu23fs) was identified in the BRCA1 gene.                         | CA ovary | 49 |
| 213 | Failure  | The sample under investigation has been processed; however, the analysis was not possible due to low quality of the genetic material. | CA ovary | 77 |
| 214 | Failure  | The sample under investigation has been processed; however, the analysis was not possible due to low quality of the genetic material. | CA ovary | 76 |
| 215 | Negative | No known pathogenic mutation was identified in patient's tumor tissue.                                                                | CA ovary | 75 |
| 216 | Negative | No known pathogenic mutation was identified in patient's tumor tissue.                                                                | CA ovary | 46 |
| 217 | Negative | No known pathogenic mutation was identified in patient's tumor tissue.                                                                | CA ovary | 72 |
| 218 | Negative | No known pathogenic mutation was identified in patient's tumor tissue.                                                                | CA ovary | 63 |
| 219 | Negative | No known pathogenic mutation was identified in patient's tumor tissue.                                                                | CA ovary | 65 |
| 220 | Failure  | The sample under investigation has been processed; however, the analysis was not possible due to low quality of the genetic material. | CA ovary | 70 |
| 221 | Positive | BRCA2- The clinically significant variant NM_000059:c.4987_4990del, p.(Val1663fs) was identified in the BRCA2 gene.                   | CA ovary | 54 |
| 222 | Positive | BRCA1- The clinically significant variant NM_007294:c.838_847del, p.(Ala280fs) was identified in the BRCA1 gene.                      | CA ovary | 38 |
| 223 | Negative | No known pathogenic mutation was identified in patient's tumor tissue.                                                                | CA ovary | 78 |
| 224 | Negative | No known pathogenic mutation was identified in patient's tumor tissue.                                                                | CA ovary | 61 |



|     |          |                                                                                                                                       |          |    |
|-----|----------|---------------------------------------------------------------------------------------------------------------------------------------|----------|----|
| 225 | Failure  | The sample under investigation has been processed; however, the analysis was not possible due to low quality of the genetic material. | CA ovary | 58 |
| 226 | Negative | No known pathogenic mutation was identified in patient's tumor tissue.                                                                | CA ovary | 55 |
| 227 | Negative | No known pathogenic mutation was identified in patient's tumor tissue.                                                                | CA ovary | 60 |
| 228 | Positive | BRCA1- The clinically significant variant NM_007294:c.4432Gdel, p.(Glu1478ArgfsTer27) was identified in the BRCA1 gene.               | CA ovary | 63 |
| 229 | Positive | BRCA1- The clinically significant variant NM_007294:c.1687C>T, p.(Gln563Ter) was identified in the BRCA1 gene.                        | CA ovary | 67 |
| 230 | Failure  | The sample under investigation has been processed; however, the analysis was not possible due to low quality of the genetic material. | CA ovary | 58 |
| 231 | Negative | No known pathogenic mutation was identified in patient's tumor tissue                                                                 | CA ovary | 53 |
| 232 | Positive | BRCA2- The clinically significant variant NM_000059:c.3975_3978dup, p.(Ala1327fs) was identified in the BRCA2 gene.                   | CA ovary | 53 |
| 233 | Negative | No known pathogenic mutation was identified in patient's tumor tissue.                                                                | CA ovary | 59 |
| 234 | Negative | No known pathogenic mutation was identified in patient's tumor tissue.                                                                | CA ovary | 66 |
| 235 | Negative | No known pathogenic mutation was identified in patient's tumor tissue.                                                                | CA ovary | 73 |
| 236 | Negative | No known pathogenic mutation was identified in patient's tumor tissue.                                                                | CA ovary | 62 |
| 237 | Positive | BRCA1- The clinically significant variant NM_007294:c.2933dup, p.(Tyr978Ter) was identified in the BRCA1 gene.                        | CA ovary | 62 |
| 238 | Failure  | The sample under investigation has been processed; however, the analysis was not possible due to low quality of the genetic material. | CA ovary | 64 |
| 239 | Failure  | The sample under investigation has been processed; however, the analysis was not possible due to low quality of the genetic material. | CA ovary | 70 |
| 240 | Positive | BRCA1- The clinically significant variant NM_007294:c.3607C>T, p.(Arg1203Ter) was identified in the BRCA1 gene.                       | CA ovary | 55 |
| 241 | Negative | No known pathogenic mutation was identified in patient's tumor tissue.                                                                | CA ovary | 56 |
| 242 | Positive | BRCA1- The clinically significant variant NM_007294:c.4065_4068del , was identified in the BRCA1 gene.                                | CA ovary | 56 |
| 243 | Negative | No known pathogenic mutation was identified in patient's tumor tissue                                                                 | CA ovary | 45 |
| 244 | Failure  | The sample under investigation has been processed; however, the analysis was not possible due to low quality of the genetic material. | CA ovary | 62 |
| 245 | Negative | No known pathogenic mutation was identified in patient's tumor tissue.                                                                | CA ovary | 60 |
| 246 | Failure  | The sample under investigation has been processed; however, the analysis was not possible due to low quality of the genetic material. | CA ovary | 75 |
| 247 | Negative | No known pathogenic mutation was identified in patient's tumor tissue.                                                                | CA ovary | 63 |
| 248 | Failure  | The sample under investigation has been processed; however, the analysis was not possible due to low quality of the genetic material. | CA ovary | 57 |
| 249 | Failure  | The sample under investigation has been processed; however, the analysis was not possible due to low quality of the genetic material. | CA ovary | 57 |

|     |          |                                                                                                                 |          |    |
|-----|----------|-----------------------------------------------------------------------------------------------------------------|----------|----|
| 250 | Positive | BRCA1- The clinically significant variant NM_007294:c.1912G>T, p.(Glu638Ter) was identified in the BRCA1 gene.  | CA ovary | 68 |
| 251 | Negative | No known pathogenic mutation was identified in patient's tumor tissue.                                          | CA ovary | 76 |
| 252 | Negative | No known pathogenic mutation was identified in patient's tumor tissue.                                          | CA ovary | 58 |
| 253 | Negative | No known pathogenic mutation was identified in patient's tumor tissue.                                          | CA ovary | 60 |
| 254 | Negative | No known pathogenic mutation was identified in patient's tumor tissue.                                          | CA ovary | 76 |
| 255 | Positive | BRCA2- The clinically significant variant NM_000059:c.4889C>G, p.(Ser1630Ter) was identified in the BRCA2 gene. | CA ovary | 77 |
| 256 | Negative | No known pathogenic mutation was identified in patient's tumor tissue.                                          | CA ovary | 38 |
| 257 | Negative | No known pathogenic mutation was identified in patient's tumor tissue.                                          | CA ovary | 57 |
| 258 | Negative | No known pathogenic mutation was identified in patient's tumor tissue.                                          | CA ovary | 70 |
| 259 | Positive | BRCA1- The clinically significant variant NM_007294:c.3607C>T, p.(Arg1203Ter) was identified in the BRCA1 gene. | CA ovary | 75 |
| 260 | Negative | No known pathogenic mutation was identified in patient's tumor tissue.                                          | CA ovary | 62 |
| 261 | Negative | No known pathogenic mutation was identified in patient's tumor tissue.                                          | CA ovary | 72 |
| 262 | Negative | No known pathogenic mutation was identified in patient's tumor tissue.                                          | CA ovary | 59 |
| 263 | Negative | No known pathogenic mutation was identified in patient's tumor tissue.                                          | CA ovary | 68 |
| 264 | Negative | No known pathogenic mutation was identified in patient's tumor tissue.                                          | CA ovary | 70 |
| 265 | Negative | No known pathogenic mutation was identified in patient's tumor tissue.                                          | CA ovary | 37 |
| 266 | Negative | No known pathogenic mutation was identified in patient's tumor tissue.                                          | CA ovary | 59 |
| 267 | Negative | No known pathogenic mutation was identified in patient's tumor tissue.                                          | CA ovary | 66 |
| 268 | Negative | No known pathogenic mutation was identified in patient's tumor tissue.                                          | CA ovary | 64 |
| 269 | Positive | BRCA1- The clinically significant variant NM_007294:c.1687C>T, p.(Gln563Ter) was identified in the BRCA1 gene   | CA ovary | 51 |
| 270 | Negative | No known pathogenic mutation was identified in patient's tumor tissue.                                          | CA ovary | 45 |
| 271 | Negative | No known pathogenic mutation was identified in patient's tumor tissue.                                          | CA ovary | 66 |
| 272 | Negative | No known pathogenic mutation was identified in patient's tumor tissue.                                          | CA ovary | 62 |
| 273 | Negative | No known pathogenic mutation was identified in patient's tumor tissue.                                          | CA ovary | 52 |
| 274 | Positive | BRCA1- The clinically significant variant NM_007294:c.135-2A>G, was identified in the BRCA1 gene.               | CA ovary | 63 |
| 275 | Negative | No known pathogenic mutation was identified in patient's tumor tissue.                                          | CA ovary | 61 |
| 276 | Negative | No known pathogenic mutation was identified in patient's tumor tissue.                                          | CA ovary | 62 |
| 277 | Positive | BRCA1-The pathogenic mutation NM_007294.4(BRCA1):c.81-1G>A was identified in BRCA1.                             | CA ovary | 67 |
| 278 | Negative | No known pathogenic mutation was identified in patient's tumor tissue.                                          | CA ovary | 67 |
| 279 | Positive | BRCA1- The clinically significant variant NM_007294:c.4375A>T, p.(Lys1459Ter) was identified in the BRCA1 gene. | CA ovary | 60 |
| 280 | Positive | BRCA1- The clinically significant variant NM_007294:c.5266dupC, was identified in the BRCA1 gene.               | CA ovary | 42 |

|     |          |                                                                                                                                                                        |          |    |
|-----|----------|------------------------------------------------------------------------------------------------------------------------------------------------------------------------|----------|----|
| 281 | Negative | No known pathogenic mutation was identified in patient's tumor tissue.                                                                                                 | CA ovary | 61 |
| 282 | Negative | No known pathogenic mutation was identified in patient's tumor tissue.                                                                                                 | CA ovary | 61 |
| 283 | Negative | No known pathogenic mutation was identified in patient's tumor tissue.                                                                                                 | CA ovary | 40 |
| 284 | Negative | No known pathogenic mutation was identified in patient's tumor tissue                                                                                                  | CA ovary | 83 |
| 285 | Negative | No known pathogenic mutation was identified in patient's tumor tissue                                                                                                  | CA ovary | 75 |
| 286 | Negative | No known pathogenic mutation was identified in patient's tumor tissue                                                                                                  | CA ovary | 66 |
| 287 | Negative | No known pathogenic mutation was identified in patient's tumor tissue                                                                                                  | CA ovary | 50 |
| 288 | Negative | No known pathogenic mutation was identified in patient's tumor tissue                                                                                                  | CA ovary | 80 |
| 289 | Negative | No known pathogenic mutation was identified in patient's tumor tissue                                                                                                  | CA ovary | 64 |
| 290 | Negative | No known pathogenic mutation was identified in patient's tumor tissue                                                                                                  | CA ovary | 45 |
| 291 | Positive | BRCA2- The clinically significant variant NM_000059:c.4987_4990del, was identified in the BRCA2 gene.                                                                  | CA ovary | 55 |
| 292 | Positive | BRCA1- The clinically significant variant NM_007294:c.5266dupC, p.(Gln1756Profs*74) was identified in the BRCA1 gene.                                                  | CA ovary | 35 |
| 293 | Negative | No known pathogenic mutation was identified in patient's tumor tissue.                                                                                                 | CA ovary | 58 |
| 294 | Negative | No known pathogenic mutation was identified in patient's tumor tissue.                                                                                                 | CA ovary | 48 |
| 295 | Positive | BRCA1- The clinically significant variant NM_007294:c.3228_3229del, p.(Gly1077AlafsTer8) was identified in the BRCA1 gene.                                             | CA ovary | 49 |
| 296 | Negative | No known pathogenic mutation was identified in patient's tumor tissue.                                                                                                 | CA ovary | 81 |
| 297 | Negative | No known pathogenic mutation was identified in patient's tumor tissue.                                                                                                 | CA ovary | 72 |
| 298 | Negative | No known pathogenic mutation was identified in patient's tumor tissue.                                                                                                 | CA ovary | 69 |
| 299 | Negative | No known pathogenic mutation was identified in patient's tumor tissue.                                                                                                 | CA ovary | 52 |
| 300 | Negative | No known pathogenic mutation was identified in patient's tumor tissue.                                                                                                 | CA ovary | 75 |
| 301 | Positive | BRCA1- The clinically significant variant NM_007294:c.4035del, p.((Glu1346LysfsTer20)) was identified in the BRCA1 gene.                                               | CA ovary | 58 |
| 302 | Vus      | No known pathogenic mutation was identified. The Variant of Uncertain Clinical Significance (VUS) NM_000059:c.2264C>G, p.(Ser755Cys) was identified in the BRCA2 gene. | CA ovary | 48 |
| 303 | Negative | No known pathogenic mutation was identified in patient's tumor tissue.                                                                                                 | CA ovary | 68 |
| 304 | Negative | No known pathogenic mutation was identified in patient's tumor tissue.                                                                                                 | CA ovary | 45 |
| 305 | Negative | No known pathogenic mutation was identified in patient's tumor tissue.                                                                                                 | CA ovary | 50 |
| 306 | Positive | BRCA1- The clinically significant variant NM_007294:c.3756_3759del, p.(Ser1253ArgfsTer20) was identified in the BRCA1 gene.                                            | CA ovary | 50 |
| 307 | Negative | No known pathogenic mutation was identified in patient's tumor tissue.                                                                                                 | CA ovary | 54 |
| 308 | Negative | No known pathogenic mutation was identified in patient's tumor tissue.                                                                                                 | CA ovary | 74 |
| 309 | Negative | No known pathogenic mutation was identified in patient's tumor tissue.                                                                                                 | CA ovary | 60 |
| 310 | Vus      | NM_007294:c.5554_5556del, p.(Thr1852del)                                                                                                                               | CA ovary | 45 |
| 311 | Negative | No known pathogenic mutation was identified in patient's tumor tissue.                                                                                                 | CA ovary | 58 |
| 312 | Negative | No known pathogenic mutation was identified in patient's tumor tissue.                                                                                                 | CA ovary | 59 |

|     |          |                                                                                                                            |          |    |
|-----|----------|----------------------------------------------------------------------------------------------------------------------------|----------|----|
| 313 | Negative | No known pathogenic mutation was identified in patient's tumor tissue.                                                     | CA ovary | 63 |
| 314 | Negative | No known pathogenic mutation was identified in patient's tumor tissue.                                                     | CA ovary | 39 |
| 315 | Negative | No known pathogenic mutation was identified in patient's tumor tissue.                                                     | CA ovary | 57 |
| 316 | Negative | No known pathogenic mutation was identified in patient's tumor tissue.                                                     | CA ovary | 54 |
| 317 | Positive | BRCA2- The clinically significant variant NM_000059:c.9371A>T, p.(Asn3124Ile) was identified in the BRCA2 gene.            | CA ovary | 68 |
| 318 | Negative | No known pathogenic mutation was identified in patient's tumor tissue.                                                     | CA ovary | 39 |
| 319 | Negative | No known pathogenic mutation was identified in patient's tumor tissue.                                                     | CA ovary | 67 |
| 320 | Negative | No known pathogenic mutation was identified in patient's tumor tissue.                                                     | CA ovary | 54 |
| 321 | Negative | No known pathogenic mutation was identified in patient's tumor tissue.                                                     | CA ovary | 55 |
| 322 | Positive | BRCA1- The clinically significant variant NM_007294:c.3700_3704del, p.(Val1234GlnfsTer8) was identified in the BRCA1 gene. | CA ovary | 61 |
| 323 | Negative | No known pathogenic mutation was identified in patient's tumor tissue.                                                     | CA ovary | 66 |
| 324 | Negative | No known pathogenic mutation was identified in patient's tumor tissue.                                                     | CA ovary | 65 |
| 325 | Negative | No known pathogenic mutation was identified in patient's tumor tissue.                                                     | CA ovary | 33 |
| 326 | Positive | BRCA2- The clinically significant variant NM_000059:c.658_659del, p.(Val220fs) was identified in the BRCA2 gene.           | CA ovary | 84 |
| 327 | Negative | No known pathogenic mutation was identified in patient's tumor tissue.                                                     | CA ovary | 57 |
| 328 | Negative | No known pathogenic mutation was identified in patient's tumor tissue.                                                     | CA ovary | 63 |
| 329 | Positive | BRCA2- The clinically significant variant NM_000059:c.9018C>G, p.(Tyr3006Ter) was identified in the BRCA2 gene.            | CA ovary | 57 |
| 330 | Negative | No known pathogenic mutation was identified in patient's tumor tissue.                                                     | CA ovary | 64 |
| 331 | Negative | No known pathogenic mutation was identified in patient's tumor tissue.                                                     | CA ovary | 71 |
| 332 | Positive | BRCA1- The clinically significant variant NM_007294:5266dupC, p.(Gln1756ProfsTer74) was identified in the BRCA1 gene.      | CA ovary | 78 |
| 333 | Negative | No known pathogenic mutation was identified in patient's tumor tissue.                                                     | CA ovary | 67 |
| 334 | Negative | No known pathogenic mutation was identified in patient's tumor tissue.                                                     | CA ovary | 59 |
| 335 | Negative | No known pathogenic mutation was identified in patient's tumor tissue.                                                     | CA ovary | 69 |
| 336 | Negative | No known pathogenic mutation was identified in patient's tumor tissue.                                                     | CA ovary | 59 |
| 337 | Negative | No known pathogenic mutation was identified in patient's tumor tissue.                                                     | CA ovary | 46 |
| 338 | Vus      | br2vus                                                                                                                     | CA ovary | 44 |
| 339 | Negative | No known pathogenic mutation was identified in patient's tumor tissue.                                                     | CA ovary | 68 |
| 340 | Negative | No known pathogenic mutation was identified in patient's tumor tissue.                                                     | CA ovary | 73 |
| 341 | Positive | BRCA1- The clinically significant variant NM_007294:c.2952del, p.(Ile986fs) was identified in the BRCA1 gene.              | CA ovary | 55 |
| 342 | Negative | No known pathogenic mutation was identified in patient's tumor tissue.                                                     | CA ovary | 74 |
| 343 | Negative | No known pathogenic mutation was identified in patient's tumor tissue.                                                     | CA ovary | 58 |
| 344 | Positive | BRCA2-The clinically significant variant NM_000059:c.6839_6840insA, p.(Glu2282fs) was identified in the BRCA2 gene.        | CA ovary | 66 |

|     |          |                                                                                                                              |          |    |
|-----|----------|------------------------------------------------------------------------------------------------------------------------------|----------|----|
| 345 | Negative | No known pathogenic mutation was identified in patient's tumor tissue                                                        | CA ovary | 53 |
| 346 | Negative | No known pathogenic mutation was identified in patient's tumor tissue                                                        | CA ovary | 64 |
| 347 | Positive | BRCA1- The clinically significant variant NM_007294:c.181T>G, p.(Cys61Gly) was identified in the BRCA1 gene.                 | CA ovary | 65 |
| 348 | Negative | No known pathogenic mutation was identified in patient's tumor tissue.                                                       | CA ovary | 49 |
| 349 | Negative | No known pathogenic mutation was identified in patient's tumor tissue.                                                       | CA ovary | 71 |
| 350 | Negative | No known pathogenic mutation was identified in patient's tumor tissue.                                                       | CA ovary | 76 |
| 351 | Positive | BRCA1- The clinically significant variant NM_007294:c.4539C>A, p.(Cys1513Ter) was identified in the BRCA1 gene.              | CA ovary | 42 |
| 352 | Negative | No known pathogenic mutation was identified in patient's tumor tissue.                                                       | CA ovary | 50 |
| 353 | Negative | No known pathogenic mutation was identified in patient's tumor tissue.                                                       | CA ovary | 62 |
| 354 | Negative | No known pathogenic mutation was identified in patient's tumor tissue.                                                       | CA ovary | 47 |
| 355 | Negative | No known pathogenic mutation was identified in patient's tumor tissue.                                                       | CA ovary | 63 |
| 356 | Positive | BRCA1- The clinically significant variant NM_007294:c.3607C>T, was identified in the BRCA1 gene.                             | CA ovary | 58 |
| 357 | Negative | No known pathogenic mutation was identified in patient's tumor tissue.                                                       | CA ovary | 66 |
| 358 | Negative | No known pathogenic mutation was identified in patient's tumor tissue.                                                       | CA ovary | 61 |
| 359 | Negative | No known pathogenic mutation was identified in patient's tumor tissue.                                                       | CA ovary | 62 |
| 360 | Positive | BRCA1- The clinically significant variant NM_007294:c.843_846delCTCA, p.(Ser282TyrfsTer15) was identified in the BRCA1 gene. | CA ovary | 59 |
| 361 | Negative | No known pathogenic mutation was identified in patient's tumor tissue.                                                       | CA ovary | 65 |
| 362 | Negative | No known pathogenic mutation was identified in patient's tumor tissue.                                                       | CA ovary | 34 |
| 363 | Negative | No known pathogenic mutation was identified in patient's tumor tissue.                                                       | CA ovary | 54 |
| 364 | Negative | No known pathogenic mutation was identified in patient's tumor tissue.                                                       | CA ovary | 74 |
| 365 | Negative | No known pathogenic mutation was identified in patient's tumor tissue.                                                       | CA ovary | 69 |
| 366 | Positive | BRCA1- The clinically significant variant NM_007294:c.1687C>T, p.(Gln563Ter) was identified in the BRCA1 gene.               | CA ovary | 68 |
| 367 | Positive | BRCA2-del                                                                                                                    | CA ovary | 50 |
| 368 | Negative | No known pathogenic mutation was identified in patient's tumor tissue.                                                       | CA ovary | 82 |
| 369 | Positive | BRCA1- The clinically significant variant NM_007294:c.3607C>T, p.(Arg1203Ter) was identified in the BRCA1 gene.              | CA ovary | 47 |
| 370 | Negative | No known pathogenic mutation was identified in patient's tumor tissue.                                                       | CA ovary | 51 |
| 371 | Positive | BRCA2- The clinically significant variant NM_000059:c.9154C>T, p.(Arg3052Trp) was identified in the BRCA2 gene.              | CA ovary | 69 |
| 372 | Negative | No known pathogenic mutation was identified in patient's tumor tissue.                                                       | CA ovary | 75 |
| 373 | Negative | No known pathogenic mutation was identified in patient's tumor tissue.                                                       | CA ovary | 59 |
| 374 | Negative | No known pathogenic mutation was identified in patient's tumor tissue.                                                       | CA ovary | 64 |
| 375 | Negative | No known pathogenic mutation was identified in patient's tumor tissue.                                                       | CA ovary | 74 |
| 376 | Negative | No known pathogenic mutation was identified in patient's tumor tissue.                                                       | CA ovary | 74 |

|     |          |                                                                                                                                                                                                                                                                                                                                                                                    |          |    |
|-----|----------|------------------------------------------------------------------------------------------------------------------------------------------------------------------------------------------------------------------------------------------------------------------------------------------------------------------------------------------------------------------------------------|----------|----|
| 377 | Negative | No known pathogenic mutation was identified in patient's tumor tissue.                                                                                                                                                                                                                                                                                                             | CA ovary | 60 |
| 378 | Negative | No known pathogenic mutation was identified in patient's tumor tissue.                                                                                                                                                                                                                                                                                                             | CA ovary | 72 |
| 379 | Negative | No known pathogenic mutation was identified in patient's tumor tissue.                                                                                                                                                                                                                                                                                                             | CA ovary | 68 |
| 380 | Positive | BRCA1- The clinically significant variant NM_007294:5266dupC, p.(Gln1756ProfsTer74) was identified in the BRCA1 gene.                                                                                                                                                                                                                                                              | CA ovary | 41 |
| 381 | Positive | BRCA2- The clinically significant variant NM_000059:c.9371A>T, p.(Asn3124Ile) was identified in the BRCA2 gene.                                                                                                                                                                                                                                                                    | CA ovary | 65 |
| 382 | Negative | No known pathogenic mutation was identified in patient's tumor tissue.                                                                                                                                                                                                                                                                                                             | CA ovary | 43 |
| 383 | Negative | No known pathogenic mutation was identified in patient's tumor tissue.                                                                                                                                                                                                                                                                                                             | CA ovary | 74 |
| 384 | Negative | No known pathogenic mutation was identified in patient's tumor tissue.                                                                                                                                                                                                                                                                                                             | CA ovary | 65 |
| 385 | Negative | No known pathogenic mutation was identified in patient's tumor tissue.                                                                                                                                                                                                                                                                                                             | CA ovary | 57 |
| 386 | Negative | No known pathogenic mutation was identified in patient's tumor tissue.                                                                                                                                                                                                                                                                                                             | CA ovary | 60 |
| 387 | Negative | No known pathogenic mutation was identified in patient's tumor tissue.                                                                                                                                                                                                                                                                                                             | CA ovary | 56 |
| 388 | Positive | BRCA1- The clinically significant variant NM_007294:c.5266dupC, p.(Gln1756Profs*74) was identified in the BRCA1 gene.                                                                                                                                                                                                                                                              | CA ovary | 74 |
| 389 | Negative | BRCA2- The clinically significant variant NM_000059:c.2979G>A, p.(Trp993Ter) was identified in the BRCA2 gene.                                                                                                                                                                                                                                                                     | CA ovary | 60 |
| 390 | Vus      | The Variant of Uncertain Clinical Significance (VUS) NM_000059:c.4412_4414del, p.(Arg1471del) was identified in the BRCA2 gene.                                                                                                                                                                                                                                                    | CA ovary | 50 |
| 391 | Positive | BRCA1- The clinically significant variant NM_007294:c.5266dupC, p.(Gln1756Profs*74) was identified in the BRCA1 gene                                                                                                                                                                                                                                                               | CA ovary | 55 |
| 392 | Negative | No known pathogenic mutation was identified in patient's tumor tissue.                                                                                                                                                                                                                                                                                                             | CA ovary | 62 |
| 393 | Positive | BRCA1- The clinically significant variant NM_007294:c.5266dupC, p.(Gln1756Profs*74) was identified in the BRCA1 gene.                                                                                                                                                                                                                                                              | CA ovary | 53 |
| 394 | Negative | No known pathogenic mutation was identified in patient's tumor tissue.                                                                                                                                                                                                                                                                                                             | CA ovary | 75 |
| 395 | Negative | No known pathogenic mutation was identified in patient's tumor tissue.                                                                                                                                                                                                                                                                                                             | CA ovary | 54 |
| 396 | Negative | No known pathogenic mutation was identified in patient's tumor tissue.                                                                                                                                                                                                                                                                                                             | CA ovary | 68 |
| 397 | Negative | No known pathogenic mutation was identified in patient's tumor tissue.                                                                                                                                                                                                                                                                                                             | CA ovary | 58 |
| 398 | Negative | No known pathogenic mutation was identified in patient's tumor tissue.                                                                                                                                                                                                                                                                                                             | CA ovary | 70 |
| 399 | Negative | No known pathogenic mutation was identified in patient's tumor tissue.                                                                                                                                                                                                                                                                                                             | CA ovary | 48 |
| 400 | Negative | No known pathogenic mutation was identified in patient's tumor tissue.                                                                                                                                                                                                                                                                                                             | CA ovary | 76 |
| 401 | Vus      | No known pathogenic mutation was identified. The only variant that may be related to the patient's condition is a.....This variation has been described in mutation databases ( <a href="http://www.umd.be/BRCA2">http://www.umd.be/BRCA2</a> ; <a href="http://www.ncbi.nlm.nih.gov/clinvar/">http://www.ncbi.nlm.nih.gov/clinvar/</a> as being of unknown clinical significance. | CA ovary | 52 |
| 402 | Negative | No known pathogenic mutation was identified in patient's tumor tissue.                                                                                                                                                                                                                                                                                                             | CA ovary | 68 |
| 403 | Positive | BRCA1- The clinically significant variant NM_007294:c.135-2A>G, was identified in the BRCA1 gene.                                                                                                                                                                                                                                                                                  | CA ovary | 48 |
| 404 | Positive | BRCA1-NM_007294:c.1687C>T, p.Gln563Ter                                                                                                                                                                                                                                                                                                                                             | CA ovary | 56 |

|     |          |                                                                                                                                                                        |          |    |
|-----|----------|------------------------------------------------------------------------------------------------------------------------------------------------------------------------|----------|----|
| 405 | Negative | No known pathogenic mutation was identified in patient's tumor tissue.                                                                                                 | CA ovary | 60 |
| 406 | Negative | No known pathogenic mutation was identified in patient's tumor tissue.                                                                                                 | CA ovary | 49 |
| 407 | Negative | No known pathogenic mutation was identified in patient's tumor tissue.                                                                                                 | CA ovary | 51 |
| 408 | Negative | No known pathogenic mutation was identified in patient's tumor tissue.                                                                                                 | CA ovary | 29 |
| 409 | Negative | No known pathogenic mutation was identified in patient's tumor tissue.                                                                                                 | CA ovary | 76 |
| 410 | Positive | BRCA1- The clinically significant variant NM_007294:c.1957A>T, p.(Lys653fs) was identified in the BRCA1 gene.                                                          | CA ovary | 80 |
| 411 | Negative | No known pathogenic mutation was identified in patient's tumor tissue.                                                                                                 | CA ovary | 50 |
| 412 | Negative | No known pathogenic mutation was identified in patient's tumor tissue.                                                                                                 | CA ovary | 59 |
| 413 | Negative | No known pathogenic mutation was identified in patient's tumor tissue.                                                                                                 | CA ovary | 67 |
| 414 | Negative | No known pathogenic mutation was identified in patient's tumor tissue.                                                                                                 | CA ovary | 78 |
| 415 | Positive | BRCA2- The clinically significant variant NM_000059:c.9371A>T (p.N3124I), was identified in the BRCA2 gene.                                                            | CA ovary | 57 |
| 416 | Positive | BRCA1- The clinically significant variant NM_007294:c.2275C>T, p.(Gln759Ter) was identified in the BRCA1 gene.                                                         | CA ovary | 59 |
| 417 | Negative | No known pathogenic mutation was identified in patient's tumor tissue.                                                                                                 | CA ovary | 52 |
| 418 | Negative | No known pathogenic mutation was identified in patient's tumor tissue.                                                                                                 | CA ovary | 78 |
| 419 | Positive | BRCA1- The clinically significant variant NM_007294:c.1471C>T, p.(Gln491Ter) was identified in the BRCA1 gene.                                                         | CA ovary | 60 |
| 420 | Negative | No known pathogenic mutation was identified in patient's tumor tissue.                                                                                                 | CA ovary | 64 |
| 421 | Negative | No known pathogenic mutation was identified in patient's tumor tissue.                                                                                                 | CA ovary | 48 |
| 422 | Positive | BRCA1- The clinically significant variant NM_007294:c.1789G>T, p.(Glu597Ter) was identified in the BRCA1 gene.                                                         | CA ovary | 56 |
| 423 | Negative | No known pathogenic mutation was identified in patient's tumor tissue.                                                                                                 | CA ovary | 73 |
| 424 | Positive | BRCA1- The clinically significant variant NM_007294:c.3607C>T, p.(Arg1203Ter) was identified in the BRCA1 gene.                                                        | CA ovary | 54 |
| 425 | Vus      | No known pathogenic mutation was identified. The Variant of Uncertain Clinical Significance (VUS) NM_007294:c.1825A>T, p.(Asn609Tyr) was identified in the BRCA1 gene. | CA ovary | 67 |
| 426 | Negative | No known pathogenic mutation was identified in patient's tumor tissue.                                                                                                 | CA ovary | 70 |
| 427 | Negative | No known pathogenic mutation was identified in patient's tumor tissue.                                                                                                 | CA ovary | 55 |
| 428 | Positive | BRCA1- The clinically significant variant NM_007294:c.3607C>T, p.(Arg1203Ter) was identified in the BRCA1 gene.                                                        | CA ovary | 64 |
| 429 | Positive | BRCA1- The clinically significant variant NM_007294:c.3607C>T, p.(Arg1203Ter) was identified in the BRCA1 gene.                                                        | CA ovary | 74 |
| 430 | Negative | No known pathogenic mutation was identified in patient's tumor tissue.                                                                                                 | CA ovary | 46 |
| 431 | Negative | No known pathogenic mutation was identified in patient's tumor tissue.                                                                                                 | CA ovary | 70 |
| 432 | Positive | BRCA2- The clinically significant variant NM_000059:c.793+1G>A, was identified in the BRCA2 gene.                                                                      | CA ovary | 60 |

|     |          |                                                                                                                  |          |    |
|-----|----------|------------------------------------------------------------------------------------------------------------------|----------|----|
| 433 | Negative | No known pathogenic mutation was identified in patient's tumor tissue.                                           | CA ovary | 62 |
| 434 | Negative | No known pathogenic mutation was identified in patient's tumor tissue.                                           | CA ovary | 48 |
| 435 | Negative | No known pathogenic mutation was identified in patient's tumor tissue.                                           | CA ovary | 52 |
| 436 | Negative | No known pathogenic mutation was identified in patient's tumor tissue.                                           | CA ovary | 56 |
| 437 | Negative | No known pathogenic mutation was identified in patient's tumor tissue.                                           | CA ovary | 89 |
| 438 | Positive | BRCA1- The clinically significant variant NM_007294:c.2955del, p.(Ile986fs) was identified in the BRCA1 gene.    | CA ovary | 57 |
| 439 | Positive | BRCA1- The clinically significant variant NM_007294:c.3607C>T, p.(Arg1203Ter) was identified in the BRCA1 gene.  | CA ovary | 44 |
| 440 | Negative | No known pathogenic mutation was identified in patient's tumor tissue.                                           | CA ovary | 60 |
| 441 | Positive | BRCA2- The clinically significant variant NM_000059:c.9371A>T, p.(Asn3124Ile) was identified in the BRCA2 gene.  | CA ovary | 53 |
| 442 | Positive | BRCA1- The clinically significant variant NM_007294:c.3607C>T, p.(Arg1203Ter ) was identified in the BRCA1 gene. | CA ovary | 52 |
| 443 | Negative | No known pathogenic mutation was identified in patient's tumor tissue.                                           | CA ovary | 52 |
| 444 | Negative | No known pathogenic mutation was identified in patient's tumor tissue.                                           | CA ovary | 61 |

---
